# Supplementary material for: The shape and size of hydroxyapatite particles dictate inflammatory responses following implantation
Source: Sci Rep. 2017 Jun 7;7:2922. doi: 10.1038/s41598-017-03086-0 (PMC5462791; doi:10.1038/s41598-017-03086-0)
Supplement: Supplementary file 1 — Supplementary info [file 41598_2017_3086_MOESM1_ESM.pdf]

# **The shape and size of hydroxyapatite particles dictate inflammatory responses following implantation**

## **Supplementary data**

*Filipa Lebre<sup>†</sup>1,4,5; Rukmani Sridharan<sup>†</sup>2,3,5; Michael J. Sawkins<sup>2,3,5</sup>; Daniel J. Kelly<sup>2,3,5</sup>; Fergal J. O'Brien<sup>2,3,5</sup>; Ed C. Lavelle<sup>\*1,4,5</sup>*

1 Adjuvant Research Group, School of Biochemistry and Immunology, Trinity Biomedical Sciences Institute, Trinity College Dublin, Dublin 2, D02 PN40, Ireland

2 Trinity Centre for Bioengineering, Trinity Biomedical Sciences Institute, Trinity College Dublin, Dublin 2, D02 PN40, Ireland

3 Tissue Engineering Research Group, Department of Anatomy, Royal College of Surgeons in Ireland, Dublin 2, Ireland

4 Centre for Research on Adaptive Nanostructures and Nanodevices (CRANN) Trinity College Dublin, Dublin 2, D02 PN40, Ireland

5 Advanced Materials Bio-Engineering Research Centre (AMBER), Trinity College Dublin, Dublin 2, D02 PN40, Ireland

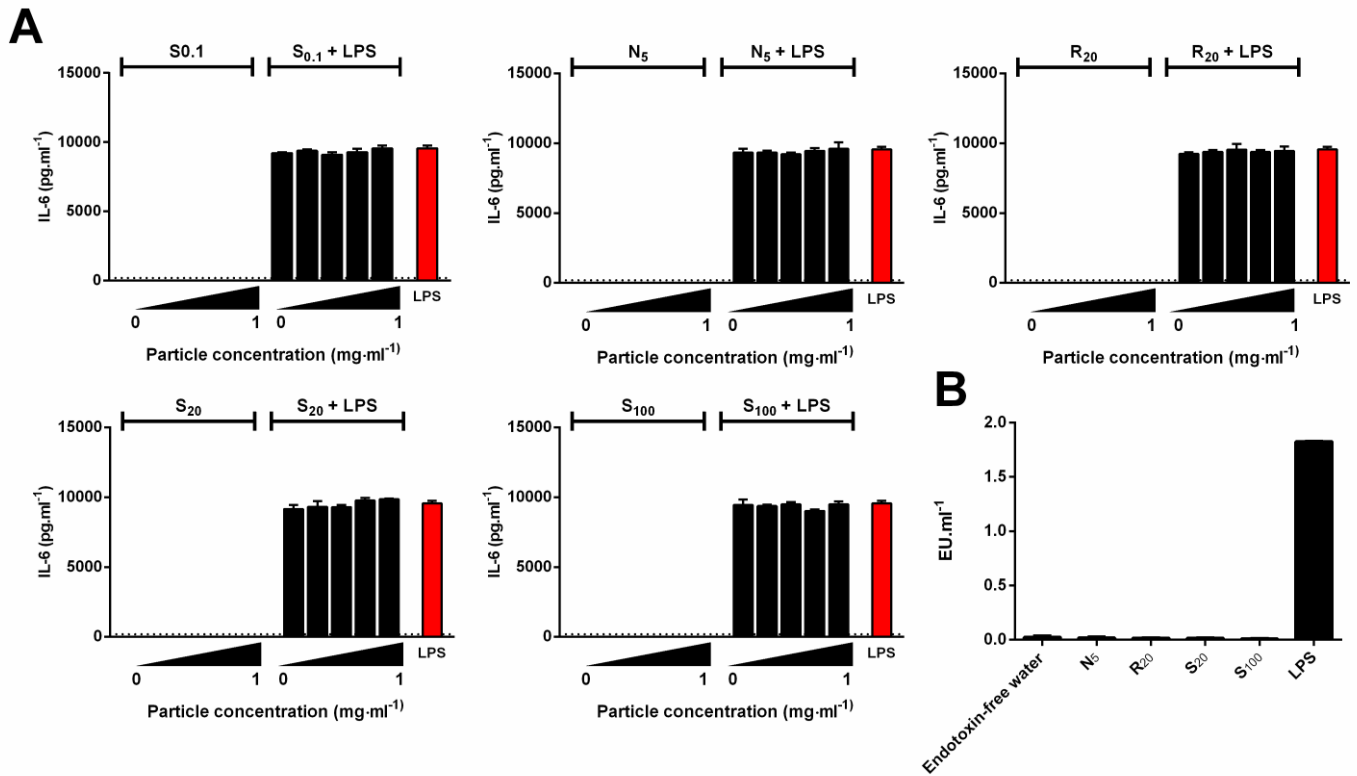

**Supplementary Figure 1.** Hydroxyapatite particle did not contain detectable endotoxin. (a) BMDCs ( $0.625 \times 10^6$  cells·ml<sup>-1</sup>) from C57BL/6 mice were stimulated with concentrations ranging from  $0.2 \mu\text{g}\cdot\text{ml}^{-1}$  to  $1 \mu\text{g}\cdot\text{ml}^{-1}$  alone or after priming with LPS ( $1 \text{ ng}\cdot\text{ml}^{-1}$ ) for 3 h. Supernatants were collected 24 h later and tested for IL-6 by ELISA. Results are mean cytokine concentrations ( $\pm$  SD) for triplicate samples. Data is representative of three independent experiments. (b) HA particles were tested for gram-negative bacterial endotoxins using LAL Chromogenic Endotoxin Quantitation Kit as per manufacturer's instructions.

**A**

| Sample Name |                     | Particle Size ( $\mu\text{m}$ ) |               |               |
|-------------|---------------------|---------------------------------|---------------|---------------|
|             |                     | <i>d(0.1)</i>                   | <i>d(0.5)</i> | <i>d(0.9)</i> |
| $S_{20}$    | >30 $\mu\text{m}$   | 23.94                           | 36.91         | 57.81         |
|             | 15-20 $\mu\text{m}$ | 11.03                           | 15.76         | 22.33         |
|             | 1-6 $\mu\text{m}$   | 8.99                            | 12.88         | 18.29         |
| $R_{20}$    | >30 $\mu\text{m}$   | 27.13                           | 37.98         | 52.84         |
|             | 15-20 $\mu\text{m}$ | 10.56                           | 15.17         | 21.55         |
|             | 1-6 $\mu\text{m}$   | 7.08                            | 10.41         | 15.13         |

**B**

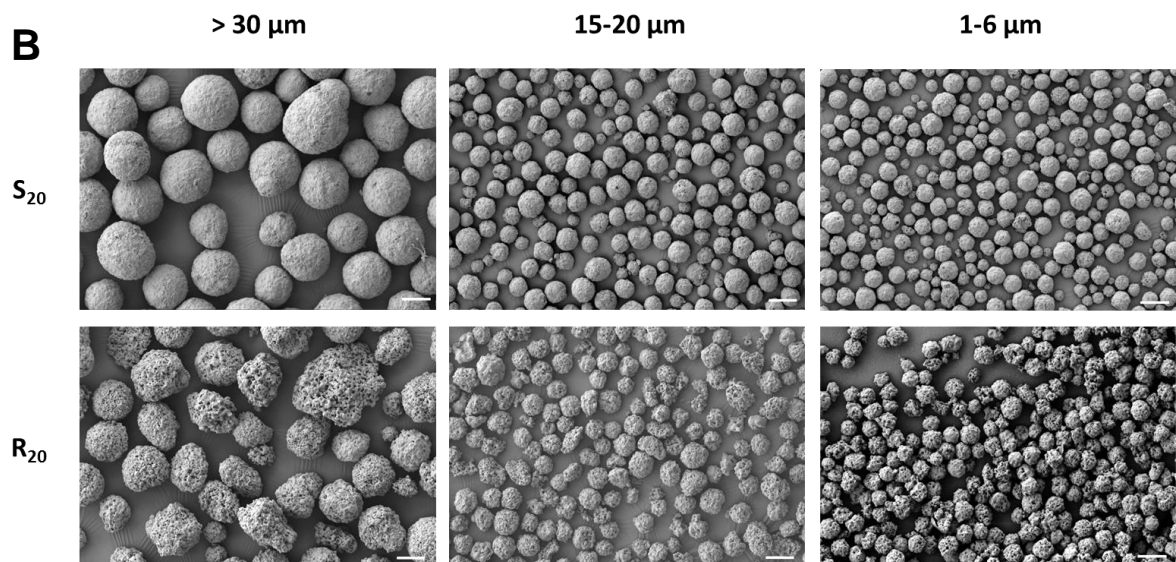

**Supplementary Figure 2.** Hydroxyapatite particles characterization after sieving. Size of HA particles was measured by dynamic light scattering (a); Scanning electron microscopy photomicrographs of  $S_{20}$  and  $R_{20}$  particles after sieving (PluriSelect) (b).

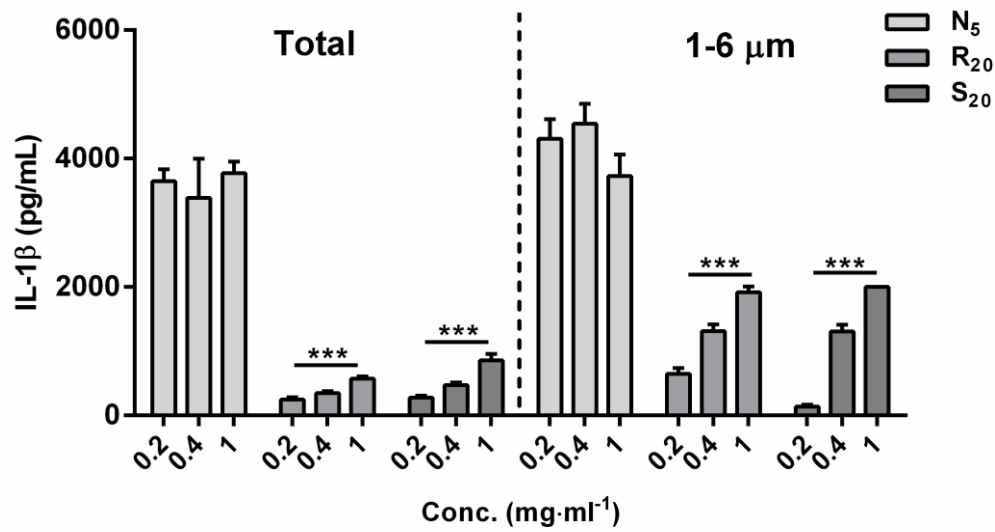

**Supplementary Figure 3.** Hydroxyapatite particle size and shape dictates cytokine production by murine BMDCs. BMDCs ( $0.625 \times 10^6$  cells·ml<sup>-1</sup>) from C57BL/6 mice were stimulated with unsieved (total) and sieved N<sub>5</sub> particles (1-6 μm; 15-20 μm; > 30 μm), with concentrations ranging from 0.2 mg·ml<sup>-1</sup> to 1 mg·ml<sup>-1</sup> alone or after priming with LPS (1 ng·ml<sup>-1</sup>) for 3 h. Supernatants were collected 24 hours later and tested for IL-1β by ELISA. Results are mean cytokine concentrations (± SD) for triplicate samples (vs N<sub>5</sub> \*  $p < 0.05$ , \*\*  $p < 0.01$ , \*\*\*  $p < 0.001$ ). Data is representative of three independent experiments.

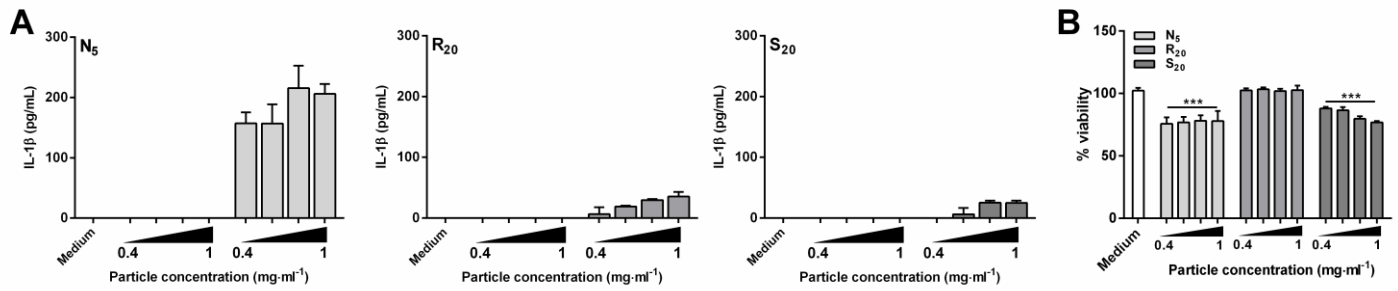

**Supplementary Figure 4.** Hydroxyapatite particle shape dictates cytokine production by murine BMDMs. BMDMs ( $1.0 \times 10^6$  cells·ml<sup>-1</sup>) from C57BL/6 mice were stimulated with sieved particle (1-6  $\mu$ m fraction) at concentrations ranging from 0.4 mg·ml<sup>-1</sup> to 1 mg·ml<sup>-1</sup> alone or after priming with LPS (1 ng·ml<sup>-1</sup>) for 3 h. Supernatants were collected 24 hours later and tested for **(A)** IL-1 $\beta$  secretion by ELISA or **(B)** LDH release to assess cell viability. (A) Results are mean cytokine concentrations ( $\pm$  SD) for triplicate samples. Data are representative of three independent experiments. (B) Error bars show means  $\pm$  SD for triplicate samples (vs medium \*\*\*  $p < 0.001$ ). Results are representative of two independent experiments.

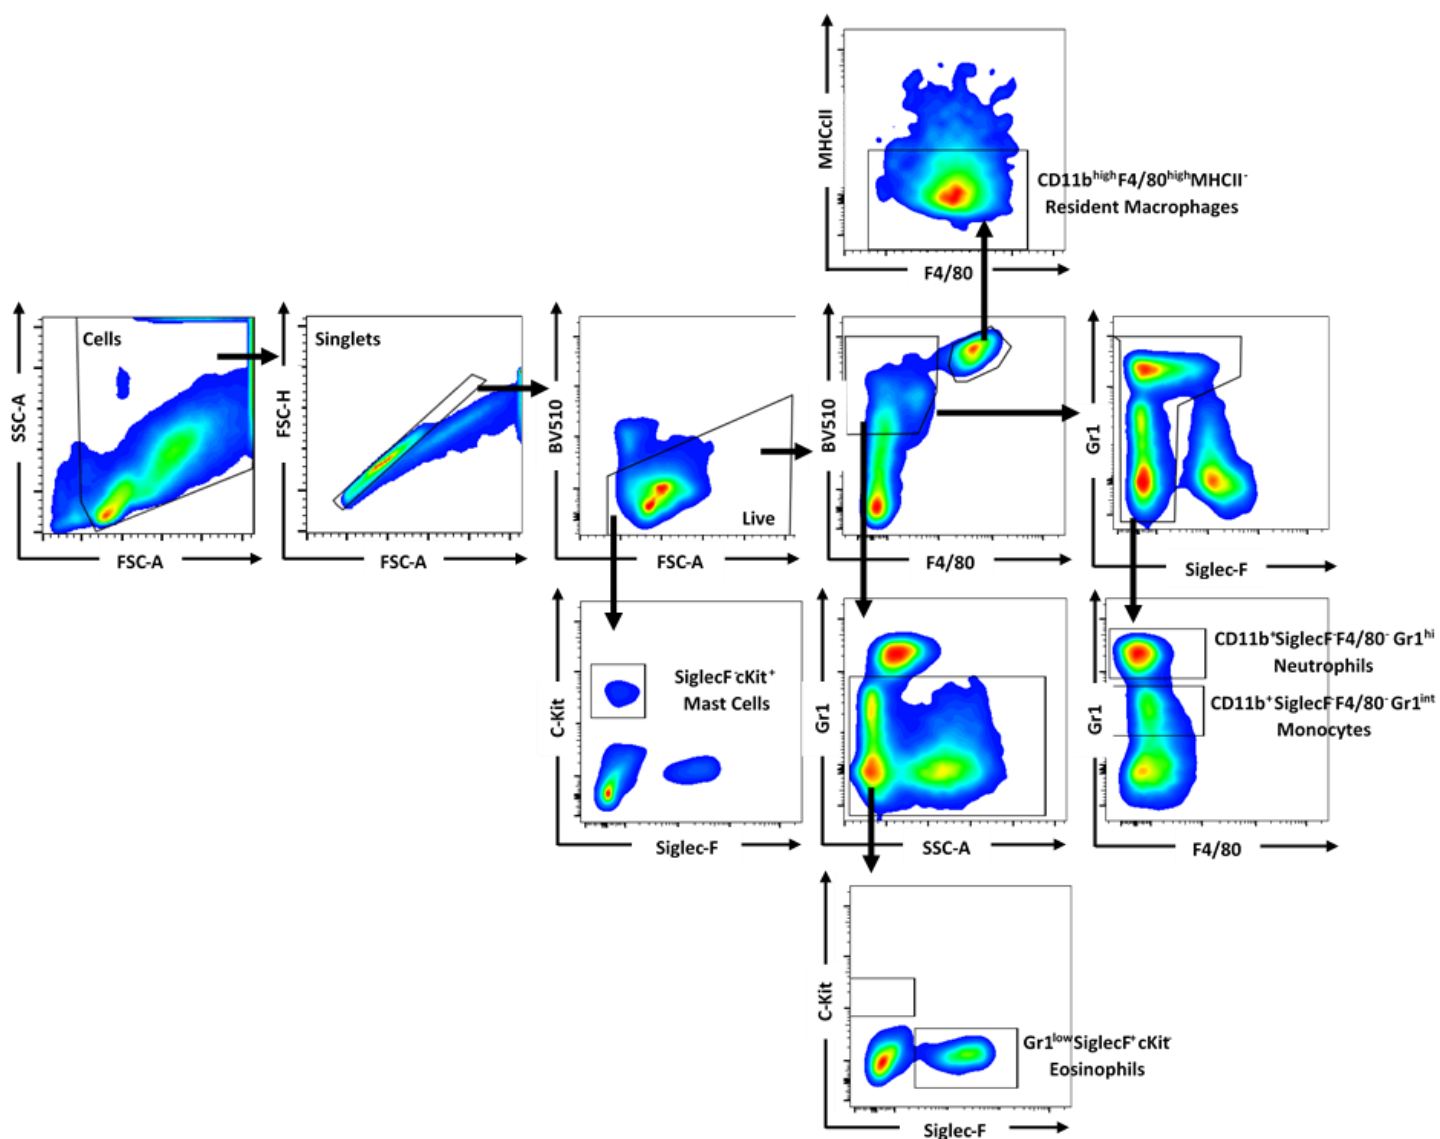

**Supplementary Figure 5.** Gating strategy for innate cell recruitment.
